# Supplementary material
Source: Springer Nature journal article supplement (https://www.springermedizin.de/resource/supplementary/12985_2008_533_MOESM6_ESM.pdf/9608306)

**Mock**

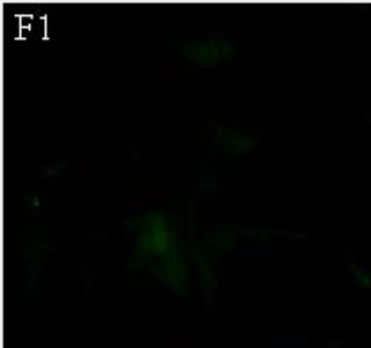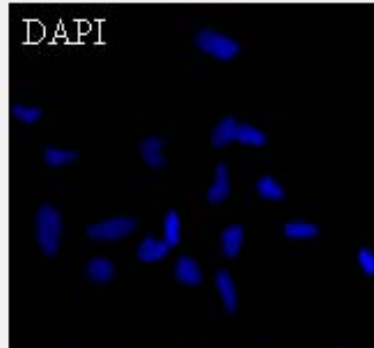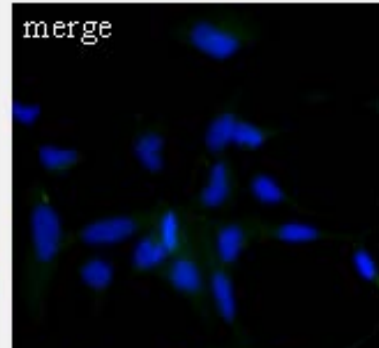

**Pre-serum**

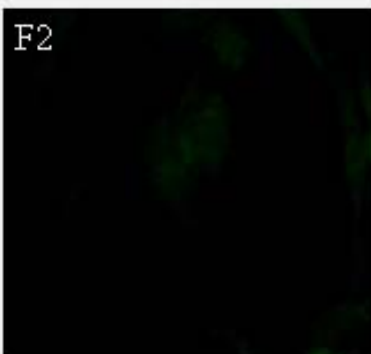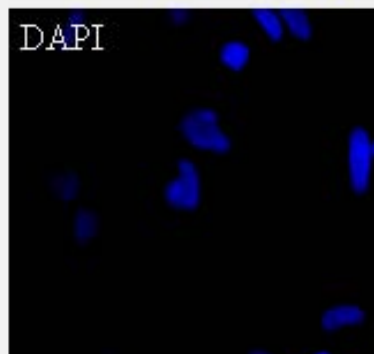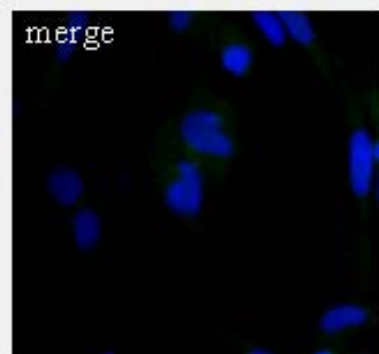

**UL31 antiserum**

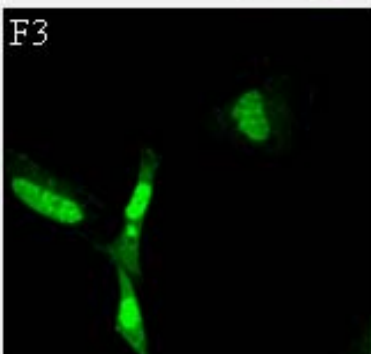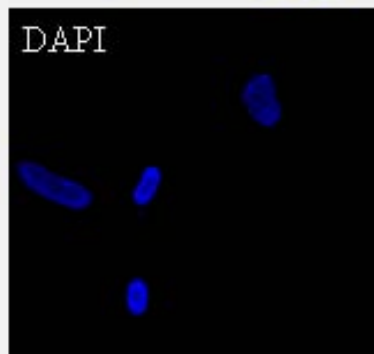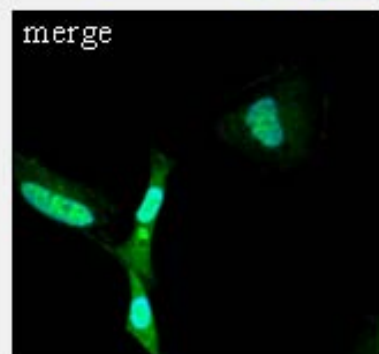

Supplement: MOESM6 [file 9608306]
